1 Beyond accuracy : score calibration in deep learning models  
2 for camera trap image sequences

3 Gaspard Dussert<sup>1</sup>, Simon Chamaillé-Jammes<sup>\*2</sup>, Stéphane Dray<sup>1</sup> and Vincent  
4 Miele<sup>1</sup>

5 <sup>1</sup>Université Lyon 1, CNRS, UMR 5558, Laboratoire de Biométrie et Biologie  
6 Evolutive, Villeurbanne, France

7 <sup>2</sup>CEFE, Université de Montpellier, CNRS, EPHE, IRD, Montpellier, France

8 November 9, 2023

9 **Abstract**

10 1. In this paper, we investigate whether deep learning models for species classi-  
11 fication in camera trap images are well calibrated, i.e. whether predicted confidence  
12 scores can be reliably interpreted as probabilities that the predictions are true. Ad-  
13 ditionally, as camera traps are often configured to take multiple photos of the same  
14 event, we also explore the calibration of predictions at the sequence level.

15 2. Here, we (i) train deep learning models on a large and diverse European  
16 camera trap dataset, using five established architectures; (ii) compare their calibra-  
17 tion and classification performances on three independent test sets; (iii) measure the  
18 performances at sequence level using four approaches to aggregate individuals pre-  
19 dictions; (iv) study the effect and the practicality of a post-hoc calibration method,  
20 for both image and sequence levels.

---

\*simon.chamaillé@cefe.cnrs.fr

21           3. Our results first suggest that calibration and accuracy are closely intertwined  
22           and vary greatly across model architectures. Secondly, we observe that averaging the  
23           logits over the sequence before applying softmax normalization emerges as the most  
24           effective method for achieving both good calibration and accuracy at the sequence  
25           level. Finally, temperature scaling can be a practical solution to further improve  
26           calibration, given the generalizability of the optimum temperature across datasets.

27           4. We conclude that, with adequate methodology, deep learning models for  
28           species classification can be very well calibrated. This considerably improves the  
29           interpretability of the confidence scores and their usability in ecological downstream  
30           tasks.

31 **Keywords** : calibration, camera trap, classification, confidence score, event, machine  
32 learning

## 33 **1 Introduction**

34 Camera traps have become a central tool in the monitoring and conservation of com-  
35 munities and populations. They generate a lot of data that can be used to infer, for  
36 instance, species richness, occupancy or activity patterns (Sollmann 2018). To exploit  
37 these data, it is first required to identify the species present in the photos or videos.  
38 This manual annotation task is generally long and tedious, but it has been shown in re-  
39 cent years that it can be replaced by an automatic classification made by deep learning  
40 models, often with an accuracy of over 90% (Norouzzadeh et al. 2018; Willi et al. 2019;  
41 Whytock, Świeżewski, et al. 2021).

42 Accuracy may not be the only model performance metrics to care about though.  
43 Accuracy is calculated from, for each image, the prediction that has the highest confi-  
44 dence score (i.e. the top-1 prediction). In many ecological studies, downstream tasks  
45 may however directly rely on the confidence score of the predictions. This can be the  
46 case for instance when considering that values above a certain threshold indicate true

47 detections, or when propagating model uncertainty into subsequent statistical models.

48       Importantly, confidence scores are frequently interpreted as probabilities of the pre-  
49 diction being true, but this is not always the case as many models may provide biased  
50 confidence scores (Gawlikowski et al. 2023). In the context of classification models, a  
51 model returning confidence scores that can be reliably interpreted as probabilities of  
52 the prediction being true is said to be well calibrated. For instance, if a model pre-  
53 dicts the label of 100 images with a confidence score of 0.8, we would expect to observe  
54 an actual accuracy of 80% on these images. However, deep learning models trained  
55 with the categorical crossentropy loss, a common practice, are often over-confident and  
56 poorly calibrated (Gawlikowski et al. 2023). Attention should therefore also be given  
57 to the properties of confidence scores, as seen in other disciplines. For instance, good  
58 calibration of deep learning models has been shown to be important for safety-critical  
59 applications such as autonomous driving (Bojarski et al. 2016) or medical diagnosis  
60 (Nair et al. 2018). In the field of ecology, a good calibration ease the interpretation of  
61 the scores, but could also be critical if the scores are used in downstream tasks such as  
62 occupancy estimation (Gimenez et al. 2022), inference of species interaction (Parsons et  
63 al. 2022), real-time alert to guide law-enforcement (Whytock, Suijten, et al. 2023), and  
64 confidence-score-based prediction checking on citizen science platforms (e.g. Zooniverse  
65 (Simpson et al. 2014)).

66       Here we explore the calibration of confidence scores in the context of species classi-  
67 fication models for camera trap data. In that context, the recurring leading approach,  
68 as assessed in recent iWildcam competitions (Beery, Agarwal, et al. 2021), consists in  
69 two steps: (step 1) detecting animals, humans and vehicles and filtering out empty im-  
70 ages using a robust detection model such as MegaDetector (Beery, Morris, et al. 2019;  
71 Mitterwallner et al. 2023) and (step 2) using a CNN classification model to identify the  
72 species in the bounding box returned by the detection model, when an animal has been  
73 detected. We therefore focus on these species classification models (step 2), which are de-

74 veloped for a large range of species all over the world. We explore the interplay between  
75 accuracy and calibration for different state-of-the-art model architectures, using camera  
76 trap data from different sources. Also, we consider the calibration of confidence scores  
77 at the level of sequences of images. Indeed, camera traps are often configured to take  
78 multiple photos at each trigger, and predictions aggregated at the level of the sequence  
79 of images (sometimes called 'the observation' or 'event'). The issue of the calibration  
80 of confidence scores at the level of sequences of images has not, to our knowledge, been  
81 addressed in the literature. Furthermore, we study the relevance of a popular post-hoc  
82 calibration method called temperature scaling (Platt 2000), for both image and sequence  
83 levels. Finally, we provide a set of good practices for researchers and practitioners in the  
84 field.

## 85 **2 Material and Methods**

### 86 **2.1 The DeepFaune Dataset**

87 We use the dataset of the DeepFaune initiative (Rigoudy et al. 2023), which is a collab-  
88 orative effort involving over 50 partners who, together, have gathered over two millions  
89 images and twenty thousand videos that they had manually annotated. These partners  
90 are affiliated to a wide range of institutions, such as organizations managing protected ar-  
91 eas, hunting federations, and academic research groups. Images and videos were mainly  
92 collected in France, but also in a few European countries. Most of the annotation were  
93 at the species level, but some were at a higher taxonomic level (e.g. mustelid). Videos  
94 were converted into images by extracting frames of the first four seconds, with a time  
95 step of one second. The dataset provides a great diversity of habitats, elevations and  
96 weather conditions, as well as a wide variety of camera trap models with different set-  
97 tings, resolutions, flash type and image processing.

## 98 **2.2 Training and validation datasets**

99 For the species classification task, it is now known (Beery, Morris, et al. 2019; Norman  
100 et al. 2023) that two-step approaches (object detector followed by a classifier) are more  
101 efficient than classifiers that process the whole image. We use MegaDetector v5 (MdV5)  
102 (Beery, Morris, et al. 2019) to extract bounding boxes of animals, human and vehicles.  
103 Because MdV5 has already near-perfect accuracy on human and vehicles we only kept,  
104 for the training of our classifier, the bounding boxes that predicted the presence of an  
105 animal. For each bounding box, we created a cropped image of the original image,  
106 resulting in 429 347 cropped images of 22 different classes (the distribution of the classes  
107 is shown in Supporting Information Figure 1).

108 To avoid overfitting and shortcut learning between the background of the images  
109 (i.e. camera trap site) and the observed species, we designed the training and validation  
110 sets to have disjoint pairs of background and species while having the same balance of  
111 species and diversity of habitats. The validation set represented about 20% of the images  
112 available while being disjoint from the training set at the species level: for each species,  
113 the validation set is made of images originating from partners different than the ones  
114 used in the training set, while being as close as possible to a 80/20 split. This requires  
115 solving a problem of combinatorial optimization known as *subset sum problem*, which  
116 is a special case of the *knapsack problem* and which can be achieved using dedicated  
117 libraries (e.g. *mknapsack*). Ultimately, we had 368 786 images in the training set and  
118 60 561 in the validation set.

## 119 **2.3 Out-of-sample test sets**

120 To demonstrate that the results of the classifier could generalize beyond the images  
121 collected in the DeepFaune initiative, 3 out-of-sample test datasets were used. These  
122 datasets originated from ecological programs conducted in three geographically distinct  
123 areas. We refer to these datasets by the name of the areas they originate from:

124 • **Pyrenees** : camera trap study in the national reserve of Orlu in the French  
125 Pyrenees, conducted by the French Biodiversity Agency (OFB), 100 266 images  
126 and 12 species after preprocessing.

127 • **Alps** : camera trap study in the Ecrins national park in the French Alps, conducted  
128 by S. Chamaille-Jammes, 8 106 images and 12 species after preprocessing.

129 • **Portugal** : camera trap study in the Peneda-Gerês National Park in Portugal  
130 (Zuleger et al. 2023), publicly available. 99 750 cropped images and 16 species  
131 after processing.

## 132 **2.4 Sequences of images**

133 It is common to configure camera traps to take a series of images after each trigger. It is  
134 therefore relevant to have a single prediction for the whole series of images. We thereafter  
135 name such series 'sequences'. In our test sets, we considered that two consecutive images  
136 taken within 10s, at the same site (i.e. the same camera trap), belonged to the same  
137 sequence. We obtained sequences of 1 to 213 images.

## 138 **2.5 Confidence score at sequence level**

139 A sequence with  $S$  images has  $S$  individual predictions that can be aggregated in many  
140 different ways to produce a single prediction for the whole sequence. Formally, for a  
141 sequence of  $S$  images  $x_i$ , the model predicts the logits  $z_i = (z_{i1}, \dots, z_{iK})$  for each image,  
142 with  $K$  the number of classes. Confidence scores are derived using the softmax function  
143 :  $p_i = (p_{i1}, \dots, p_{iK}) = \text{softmax}(z_{i1}, \dots, z_{iK})$ . We aimed at predicting the confidence scores  
144 of the sequence  $p_{seq} = (p_{seq1}, \dots, p_{seqK})$  as a function of the predictions at the image  
145 level. We explored four different aggregation functions:

146 • **Average Score** : We averaged, over the sequence, the scores for individual pic-

147 tures of the sequence:

$$p_{seq} = \left( \frac{1}{S} \sum_{i=1}^S p_{i1}, \dots, \frac{1}{S} \sum_{i=1}^S p_{iK} \right) \quad (1)$$

148 • **Average Logit** : We averaged, over the sequence, the logits for individual pictures  
149 of the sequence, and then applied the softmax function:

$$p_{seq} = \text{softmax} \left( \frac{1}{S} \sum_{i=1}^S z_{i1}, \dots, \frac{1}{S} \sum_{i=1}^S z_{iK} \right) \quad (2)$$

150 • **Max Score** : We kept the scores of the image that had the highest score amongst  
151 all scores of all images of the sequence:

$$p_{seq} = p_{i^*}, \text{ with } i^* = \arg \max_{i \in [1, S]} \left\{ \max_{k \in [1, K]} \{p_{ik}\} \right\} \quad (3)$$

152 • **Max Logit** : We kept the scores of the image that had the highest logit amongst  
153 all logits of all images of the sequence:

$$p_{seq} = p_{i^*}, \text{ with } i^* = \arg \max_{i \in [1, S]} \left\{ \max_{k \in [1, K]} \{z_{ik}\} \right\} \quad (4)$$

## 154 2.6 Calibration metrics

155 For a set of  $N$  images, we define the true class of the  $i$ -th image  $y_i$  and  $p_i = (p_{i1}, \dots, p_{iK})$   
156 the confidences scores of the  $K$  classes. The predicted class  $\hat{y}_i$  is the top-1 classification  
157 prediction, that is the class with the greatest confidence score, denoted  $s_i$ :

$$\hat{y}_i = \arg \max_{k \in [1, K]} p_{ik} \quad \text{and} \quad s_i = \max_{k \in [1, K]} p_{ik} \quad (5)$$

158 For  $M$  evenly spaced bins, we can define  $b_m$  the set of indices  $i$  such as  $s_i \in ]\frac{m-1}{M}, \frac{m}{M}]$

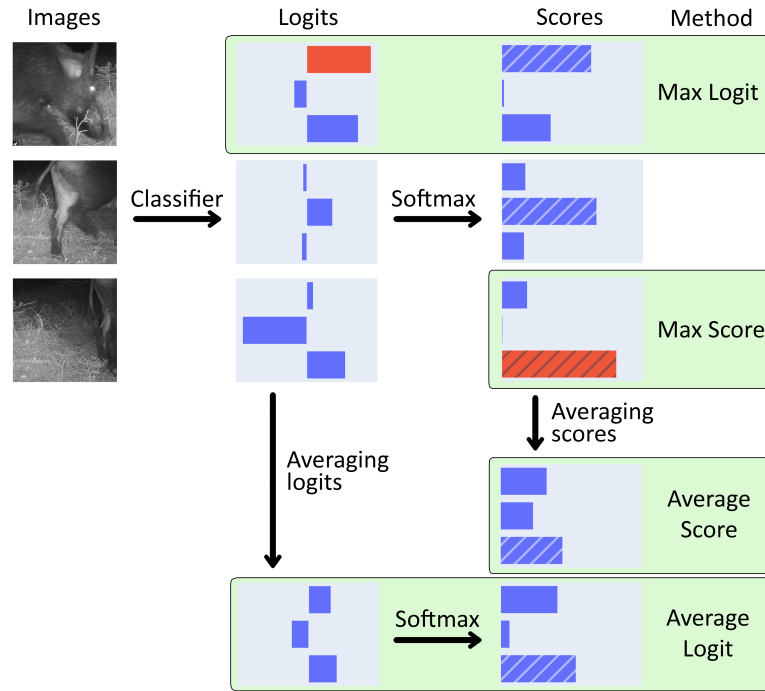

Figure 1: Illustration of the four aggregation methods. The greatest overall logit and score are in red. The top-1 score is hatched to emphasize that only this score is used to calculate the calibration.

159 and compute the average bin accuracy and the average bin confidence score :

$$\text{acc}(b_m) = \frac{1}{|b_m|} \sum_{i \in b_m} \mathbb{1}(\hat{y}_i = y_i) \quad (6)$$

160

$$\text{conf}(b_m) = \frac{1}{|b_m|} \sum_{i \in b_m} s_i \quad (7)$$

161 The bin-wise accuracy can be plotted to construct the reliability histogram (Guo et  
 162 al. 2017) (e.g. Supporting Information Figure 3). It allows to visualize the calibration of  
 163 a model: the closest the tops of the histogram bars are from the identity line, the better  
 164 calibrated the model is. In addition, if the tops of the histogram bars are mostly above  
 165 (resp. below) the line, the model is said to be under-confident (resp. over-confident).

166 The most common metric to measure the model's calibration quantitatively is the



167 Expected Calibration Error (ECE) (Guo et al. 2017). ECE is defined as the bin-wise  
168 calibration error weighted by the size of the bin :

$$\text{ECE} = \sum_{m=1}^M \frac{|b_m|}{N} |\text{acc}(b_m) - \text{conf}(b_m)| \quad (8)$$

169 Due to the large amount of images in our test sets, we decided to use a greater number  
170 of bins, specifically 20 instead of the standard 15, to obtain a more precise measurement  
171 of calibration with the ECE. In addition to this metric, we evaluated the classification  
172 performance of our classifier with the accuracy metric. These two metrics can also be  
173 used to evaluate the classification and the calibration at the sequence level, using the  
174 score  $p_{seq}$  and the associated predicted label  $\hat{y}_{seq} = \arg \max_{k \in [1, K]} p_{seq}$ .

## 175 2.7 Temperature Scaling

176 Temperature scaling (Platt 2000) is a post-processing method to improve the calibration  
177 of the model after the training. The scores predicted by the model are rescaled by a  
178 temperature parameter  $T > 0$  using a generalization of the softmax function :

$$p_{ij} = \frac{\exp^{z_{ij}/T}}{\sum_{k=1}^K \exp^{z_{ik}/T}} \quad (9)$$

179 For  $T = 1$  the scores obtained are the same as with the standard softmax function.  
180  $T > 1$  leads to lower scores and helps when the model is over-confident. Conversely,  
181  $T < 1$  increases the scores and helps under-confident models. For a given dataset, it is  
182 possible to determine the optimal temperature  $T^*$ , that minimize the ECE. However,  
183 this optimum temperature may differ from one dataset to another, and determining the  
184 optimum requires access to the labels. It is therefore unrealistic to use this individ-  
185 ual temperature  $T^*$  to compare methods, as it cannot be calculated for a new dataset  
186 without manually annotating a fraction of the data. Instead, we propose to look at  
187 performance using a single temperature  $\bar{T}$  shared across the three datasets. We define

188  $\bar{T}$  as the temperature that minimizes the average ECE across the 3 test datasets. Tem-  
189 perature scaling can be combined with the four aggregation method (Section 2.5) to  
190 calibrate sequence level predictions by simply replacing the standard softmax function  
191 with Equation 9.

## 192 **2.8 Deep learning models**

193 We used 5 established machine learning architectures: EfficientNetV2, ConvNext, ViT,  
194 Swin Transformer V2, and MobileNetV3. (Tan and Le 2021; Zhuang Liu et al. 2022;  
195 Dosovitskiy et al. 2021; Ze Liu et al. 2022; Howard et al. 2019). We have selected these  
196 architectures to represent CNNs (EfficientNetV2, ConvNext), Transformers (Swin, ViT),  
197 as well as lightweight architectures that could be deployed in camera traps that do the  
198 classification at the edge (MobileNetV3). Models were trained using the TIMM library  
199 (Wightman 2019) with transfer-learning from ImageNet-22k (Ridnik et al. 2021), the  
200 largest publicly available database. Data augmentation was applied using the imgaug  
201 library (A. B. Jung et al. 2020) using only standard transformations such as flips, crops,  
202 conversion to grayscale and affine transformation. The optimization was done using  
203 SGD, with a batch size of 32 and a different learning rate adapted for each architecture.  
204 To avoid overfitting, early stopping was used while monitoring the validation accuracy  
205 and with a patience of 10 epochs.

## 206 **3 Results**

### 207 **3.1 Calibration at the image level**

208 Generally, we observed that calibration (as measured by ECE) was negatively correlated  
209 with accuracy across models, for the 3 test datasets (Figure 2). ConvNext was the model  
210 providing the best overall performance. In particular, this model was slightly better in  
211 accuracy but much more efficient in terms of calibration (ECE of 2.37%, more than

212 2 times less than the second-best model, Swin Transformer V2, which has an ECE of  
 213 5.04%) on the Portugal dataset. In the meantime, the lightweight model, MobileNet,  
 214 had bad to very bad (ECE of 34.27% on the Portugal dataset) accuracy and calibration  
 215 performances.

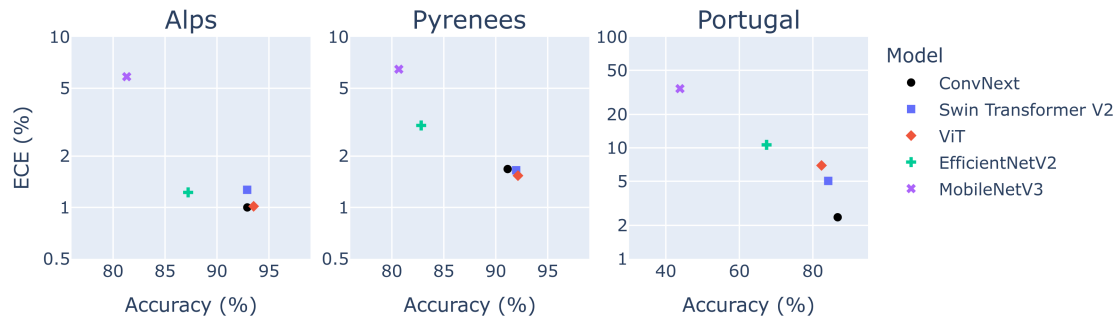

Figure 2: Scatterplot of ECE vs. accuracy values for five models (colored points) and three test data sets (panels), computed at the image level. Here, the ECE is not post-calibrated with temperature scaling (i.e. the temperature is 1 for all models).

216 As expected, temperature scaling allowed improving ECE values, for all models and  
 217 datasets. We almost always observed a V-shape relationship between ECE and tem-  
 218 perature, with ECE increasing quickly and by several percents around the optimum  
 219 temperature value (Figure 3). This optimum temperature was generally greater than  
 220 1, suggesting that all models were initially overconfident to a greater or lesser extent.  
 221 Interestingly, the V-shape curves of the different datasets overlapped well for the most  
 222 accurate models (ConvNext and transformed-based models, ViT and Swin), and opti-  
 223 mum temperature were similar across datasets. This suggested that a single optimum  
 224 temperature would be sufficient to achieve efficient post-processing calibration. Indeed,  
 225 using temperature scaling with temperature  $\bar{T}$ , the models exhibited on average a rela-  
 226 tive reduction in ECE of 38% compared to without temperature scaling ( $T = 1$ ) (dashed  
 227 line in Figure 3).

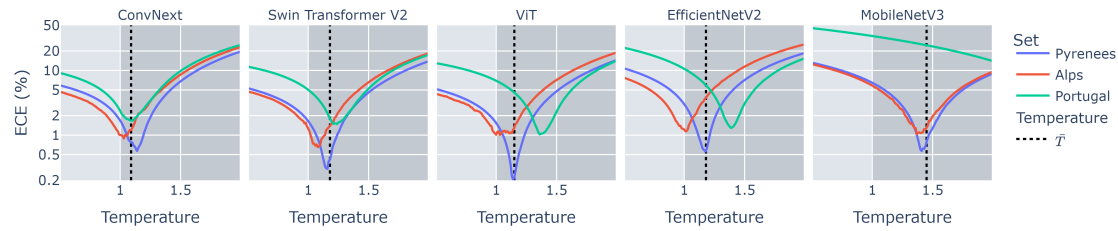

Figure 3: Curves of ECE values along the gradient of temperature values, for five models (panels) and three test data sets (colored curves). An optimum temperature below 1 indicates an underconfident model (light gray area), and above 1 indicates an overconfident model (dark gray area). The vertical dashed line shows  $\bar{T}$ , the temperature that minimized the average ECE across the 3 test datasets.

## 228 3.2 Calibration at the sequence level

229 Classification accuracy was much greater at the sequence level than at the image level  
230 (Figure 4 top). This was true for all models and all datasets, with up to +10% of  
231 accuracy for MobileNetV3 on the Portugal dataset. The Average Score and Average  
232 Logit were the two best methods for maximizing accuracy, with a slight advantage for  
233 the former. The gain in accuracy was however lower for models that were already  
234 efficient at the image level (ConvNext, ViT and SwinTransformer), but those remained  
235 the best models at the sequence level. Importantly, of the two aggregation methods  
236 that improved accuracy most, Average Score and Average Logit, only Average Logit  
237 provided well calibrated scores (Figure 4 bottom). The Average score was actually the  
238 worst aggregation method for calibration. Therefore, considering both accuracy and  
239 calibration metrics, the Average Logit was the best aggregation method.

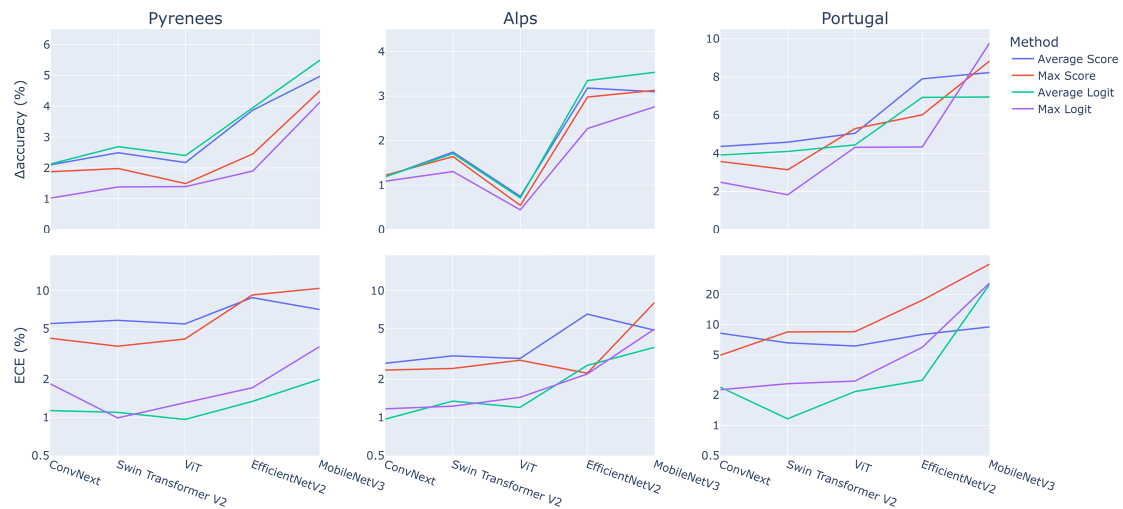

Figure 4:  $\Delta$ Accuracy (top, the greater the better) and ECE (bottom, the lower the better) for the four aggregation methods (colored curves) and five models (x-axis) on three test data sets (3 panels).  $\Delta$ Accuracy is the difference between the accuracy at the sequence level and the accuracy at the image level.

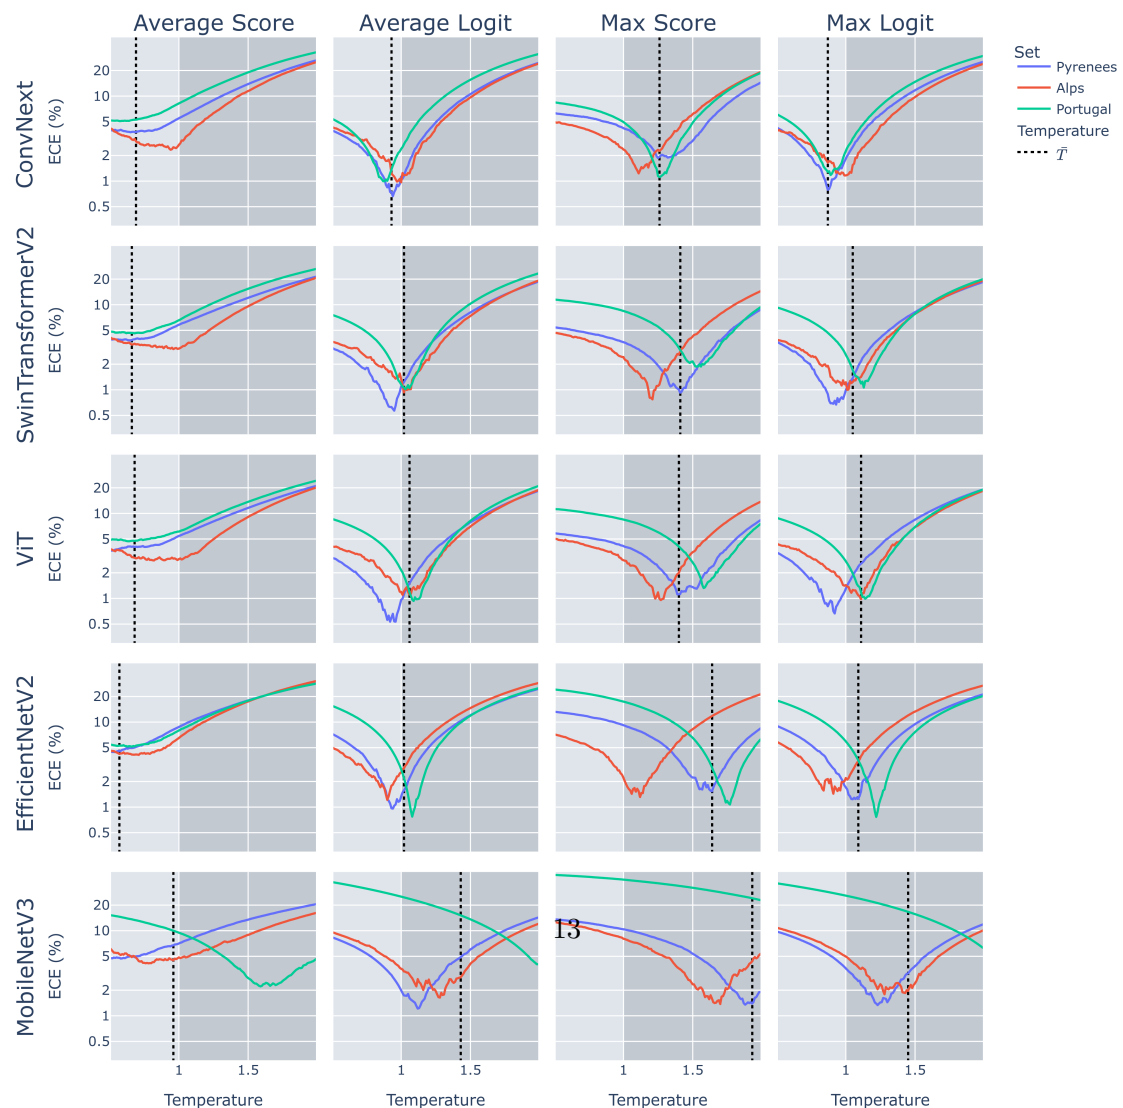

Figure 5: Curves of ECE values along the gradient of temperature values, for the four aggregation methods (columns), the five models (rows) and the three test datasets (colored curves). Light/gray area and dashed line defined as in Figure 3.

240 We finally studied the interplay between temperature scaling and aggregation meth-  
241 ods. We observed that the aforementioned V-shape was more flat for the Average Score  
242 method than for the other methods (first column in Figure 5 versus the others). This  
243 confirmed that this method was the worst method, even with temperature scaling. We  
244 also noted that the Average Logit method provided the lowest ECE values overall (1.17%  
245 on average), and thus remained the best method, with temperature scaling further im-  
246 proving calibration at sequence level.

247 Looking at  $\bar{T}$  and the optimum temperature of each set (minima and dashed lines  
248 on Figure 5), it can be noted that using the Average Score methods led models towards  
249 underconfidence, whereas using the Max Score methods led them towards overconfidence.  
250 This observation is also visible in the reliability histogram, as shown in Supporting  
251 Information (Supplementary Figure 3). Meanwhile, models using the Average Logit  
252 method displayed optimum temperatures close to 1 and, as a consequence, a temperature  
253  $\bar{T}$  close to 1 as well. We therefore concluded that the Average Logit method did not  
254 led to under- or over-confidence of models in our experiments. Also, and as observed at  
255 the image level, a single temperature (possibly close to 1) would be sufficient to achieve  
256 good post-processing calibration with the Average Logit method.

## 257 4 Discussion

258 This study assessed the calibration of confidence scores, at image and sequence level, for  
259 different deep learning models in the context of species classification in camera trap data.  
260 Using five state-of-the-art models and three out-of-sample test datasets, we showed that  
261 score calibration can vary greatly across model architectures, in a way that is consistent  
262 across test sets. Further, we showed that the different aggregation methods to obtain  
263 scores at the sequence level gave very different calibration values, and that the Average  
264 Logit method must be preferred over the others for optimizing both accuracy and cal-

265 ibration. Finally, we showed that temperature scaling can be used both at image level  
266 and sequence level, with a single temperature  $\bar{T}$  that do not have to vary across datasets,  
267 to further improve the calibration. These observations pave the way for practitioners  
268 that are invited to 1/ monitor calibration as well as accuracy, 2/ use the Average Logit  
269 method and 3/ estimate the optimal temperature on their own test dataset and use it  
270 for the model deployment.

271 Differences in models' performance can be partly explained by model size. Indeed we  
272 found that models with the highest number of parameters (ConvNext, ViT, SwinTrans-  
273 former) gave the best accuracy and ECE values. On the other hand, the only lightweight  
274 model, MobileNet, was consistently the worst model. Despite some literature showing  
275 that neural networks can be poorly calibrated, our result shows that this is not always the  
276 case (see also Minderer et al. (2021)), and that certain families of model architectures,  
277 such as ConvNext here, are intrinsically better calibrated than others, independently of  
278 the size of the model. The calibration of each model can be further improved on each  
279 dataset using temperature scaling as post-processing function. However, determining  
280 the optimal T requires annotating at least a fraction of the target set of images, which  
281 is something that practitioners would like to avoid if possible. Fortunately, we showed  
282 empirically with three very different datasets that the optimal temperatures are very  
283 close from one dataset to another, which suggests the generalizability of a single temper-  
284 ature that can be determined and fixed for future test sets. That said, we do not claim  
285 that the optimal temperatures defined in this paper can be used directly when using one  
286 of the studied architectures. Indeed, these temperatures are valid for a given training  
287 procedure (datasets, hyperparameters). In practice, it is mandatory to estimate the  
288 temperature using available test dataset(s) and subsequently maintain this temperature  
289 for deployment (since we showed it will be generalizable). This way, when the model will  
290 be used to classify new unseen data, the previously estimated temperature will ensure a  
291 better calibration of the predicted scores.

292 Proper model calibration at the image level is not always sufficient, as many soft-  
293 ware programs and scientific studies operate at the scale of the sequences that define  
294 the relevant 'observations' or 'events' from an ecological viewpoint. It is therefore ex-  
295 tremely important to be able to calibrate the predictions at sequence level. For the first  
296 time, we showed that the most intuitive approach, in which scores are averaged, did not  
297 provide the best accuracy and had the worst calibration, with largely under-confident  
298 predictions. Interestingly, our findings can be confirmed by the analogy with ensemble  
299 models. These approaches use  $N$  models to make a prediction on *one* image, whereas we  
300 use  $N$  images to make a prediction with *one* model at the sequence level. Wu and Gales  
301 (2021) showed that for ensemble models, individual model calibration is not sufficient to  
302 yield a calibrated ensemble prediction, and that their own method, which is equivalent to  
303 Average Score approach also leads to under-confidence. Moreover, Rahaman and Thiery  
304 (2021) show that, thanks to this natural shift in the optimal temperature when models  
305 are ensembled, if the individual models were slightly overconfident ( $T > 1$ , as is often the  
306 case in deep learning) then the ensemble model was naturally calibrated ( $T \sim 1$ ). Our  
307 results greatly support the use of the Average Logit method for aggregating individual  
308 scores at the sequence level. It shifts slightly the optimal temperature towards undercon-  
309 fidence, which counterbalanced the overconfident nature of deep learning networks, and  
310 resulted in sequence level prediction that are almost calibrated without post-processing.  
311 With Average Logit, it is still interesting to use temperature scaling to improve calibra-  
312 tion as much as possible, especially given that the ECE minima are again very close to  
313 each other and allow a single temperature to be set.

314 In this work, we focused on temperature scaling and did not consider other methods  
315 that have been shown to sometimes improve calibration, such as label smoothing and  
316 mixup (Szegedy et al. 2015; Zhang et al. 2018). We did so because these two methods  
317 are actually debated, as several studies have showed that they can actually worsen cal-  
318 ibration when combined with temperature scaling (Wang et al. 2023; Minderer et al.



319 2021). As Minderer et al. (2021) state, "label smoothing creates artificially underconfi-  
320 dent models and may therefore improve calibration for a specific amount of distribution  
321 shift". Label smoothing also assumes that all incorrect classes are equally likely (Maher  
322 and Kull 2021), which is obviously problematic in ecology (e.g., a wrongly predicted  
323 roe deer is much more likely to be a red deer than a wolf). Mixup also deteriorates  
324 calibration properties of networks by creating non-realistic images in the training set  
325 and leading to substantial distributional shift (Rahaman and Thiery 2021; Gawlikowski  
326 et al. 2023).

327 We believe that our results could be of use to researchers and practitioners in the  
328 field of computer vision of camera trap images. Firstly, we encourage everyone to select  
329 the architecture of their model using not only accuracy but also by calculating the ECE.  
330 Secondly, we recommend using the Average Logit method to aggregate information at  
331 sequence level, as it performs very well in terms of accuracy and calibration. Finally,  
332 to use temperature scaling and make calibration even better, the optimum temperature  
333 can be calculated on a test dataset and kept for future datasets.

## 334 **Acknowledgements**

335 This work was granted access to the HPC resources of IDRIS under the allocation 2022-  
336 AD010113729 made by GENCI.

337 We acknowledge the organizations and people contributing to the DeepFaune initiative.

## 338 **Conflict of interest**

339 None of the authors has a conflict of interest.

## 340 **Author contributions**

341 G.D., S.C.J., S.D. and V.M. conceived the ideas and designed the methodology. G.D.,  
342 S.C.J. and V.M. gathered the training data. S.C.J collected the data of the Alps test  
343 set. G.D. and V.M. coded and performed the analysis. G.D. wrote the first version of  
344 the manuscript, S.C.J., S.D. and V.M. contributed critically to the drafts and gave final  
345 approval for publication.

## 346 **Data availability statement**

347 The five trained models, all derived data used in the analysis, and the code for the infer-  
348 ence and metric calculation are available at <https://doi.org/10.5281/zenodo.10014376>.  
349 The Portugal and Alps datasets are available at <https://doi.org/10.15468/rah33j> and  
350 <https://doi.org/10.5281/zenodo.10014376>. The Pyrenees dataset is available upon re-  
351 quest only, because of the presence of a sensitive species (brown bear).

## 352 **References**

- 353 Beery, Sara, Arushi Agarwal, Elijah Cole, and Vighnesh Birodkar (2021). *The iwildcam*  
354 *2021 competition dataset*. arXiv:2105.03494 [cs].
- 355 Beery, Sara, Dan Morris, and Siyu Yang (July 2019). *Efficient Pipeline for Camera Trap*  
356 *Image Review*. arXiv:1907.06772 [cs]. DOI: 10.48550/arXiv.1907.06772.
- 357 Bojarski, Mariusz, Davide Del Testa, Daniel Dworakowski, Bernhard Firner, Beat Flepp,  
358 Prasoon Goyal, Lawrence D. Jackel, Mathew Monfort, Urs Muller, Jiakai Zhang, Xin  
359 Zhang, Jake Zhao, and Karol Zieba (Apr. 2016). *End to End Learning for Self-Driving*  
360 *Cars*. arXiv:1604.07316 [cs]. DOI: 10.48550/arXiv.1604.07316.
- 361 Dosovitskiy, Alexey, Lucas Beyer, Alexander Kolesnikov, Dirk Weissenborn, Xiaohua  
362 Zhai, Thomas Unterthiner, Mostafa Dehghani, Matthias Minderer, Georg Heigold,

- 363 Sylvain Gelly, Jakob Uszkoreit, and Neil Houlsby (June 2021). *An Image is Worth*  
364 *16x16 Words: Transformers for Image Recognition at Scale*. arXiv:2010.11929 [cs].  
365 DOI: 10.48550/arXiv.2010.11929.
- 366 Gawlikowski, Jakob, Cedrique Rovile Njjeutcheu Tassi, Mohsin Ali, Jongseok Lee, Matthias  
367 Humt, Jianxiang Feng, Anna Kruspe, Rudolph Triebel, Peter Jung, Ribana Roscher,  
368 et al. (2023). “A survey of uncertainty in deep neural networks”. In: *Artificial Intel-*  
369 *ligence Review*, pp. 1–77.
- 370 Gimenez, Olivier, Maëlis Kervellec, Jean-Baptiste Fanjul, Anna Chainé, Lucile Marescot,  
371 Yoann Bollet, and Christophe Duchamp (Apr. 2022). “Trade-off between deep learn-
- 372 ing for species identification and inference about predator-prey co-occurrence”. en.  
373 In: *Computo*. ISSN: 2824-7795. DOI: 10.57750/yfm2-5f45.
- 374 Guo, Chuan, Geoff Pleiss, Yu Sun, and Kilian Q. Weinberger (Aug. 2017). *On Calibration*  
375 *of Modern Neural Networks*. arXiv:1706.04599 [cs].
- 376 Howard, Andrew, Mark Sandler, Grace Chu, Liang-Chieh Chen, Bo Chen, Mingxing  
377 Tan, Weijun Wang, Yukun Zhu, Ruoming Pang, Vijay Vasudevan, Quoc V. Le, and  
378 Hartwig Adam (Nov. 2019). *Searching for MobileNetV3*. arXiv:1905.02244 [cs].
- 379 Jung, Alexander B., Kentaro Wada, Jon Crall, Satoshi Tanaka, Jake Graving, Christoph  
380 Reinders, Sarthak Yadav, Joy Banerjee, Gábor Vecsei, Adam Kraft, Zheng Rui, Jirka  
381 Borovec, Christian Vallentin, Semen Zhydenko, Kilian Pfeiffer, Ben Cook, Ismael  
382 Fernández, François-Michel De Rainville, Chi-Hung Weng, Abner Ayala-Acevedo,  
383 Raphael Meudec, Matias Laporte, et al. (2020). *imgaug*. [https://github.com/](https://github.com/aleju/imgaug)  
384 [aleju/imgaug](https://github.com/aleju/imgaug). Online; accessed 01-Feb-2020.
- 385 Liu, Ze, Han Hu, Yutong Lin, Zhuliang Yao, Zhenda Xie, Yixuan Wei, Jia Ning, Yue Cao,  
386 Zheng Zhang, Li Dong, Furu Wei, and Baining Guo (Apr. 2022). *Swin Transformer*  
387 *V2: Scaling Up Capacity and Resolution*. arXiv:2111.09883 [cs].

- 388 Liu, Zhuang, Hanzi Mao, Chao-Yuan Wu, Christoph Feichtenhofer, Trevor Darrell, and  
389 Saining Xie (Mar. 2022). *A ConvNet for the 2020s*. arXiv:2201.03545 [cs]. DOI: 10.  
390 48550/arXiv.2201.03545.
- 391 Maher, Mohamed and Meelis Kull (Oct. 2021). *Instance-based Label Smoothing For Bet-*  
392 *ter Calibrated Classification Networks*. arXiv:2110.05355 [cs].
- 393 Minderer, Matthias, Josip Djolonga, Rob Romijnders, Frances Hubis, Xiaohua Zhai,  
394 Neil Houlsby, Dustin Tran, and Mario Lucic (Oct. 2021). *Revisiting the Calibration*  
395 *of Modern Neural Networks*. arXiv:2106.07998 [cs].
- 396 Mitterwallner, Veronika, Anne Peters, Hendrik Edelhoff, Gregor Mathes, Hien Nguyen,  
397 Wibke Peters, Marco Heurich, and Manuel J. Steinbauer (2023). “Automated visitor  
398 and wildlife monitoring with camera traps and machine learning”. In: *Remote Sensing*  
399 *in Ecology and Conservation* n/a.n/a. DOI: <https://doi.org/10.1002/rse2.367>.  
400 eprint: [https://zslpublications.onlinelibrary.wiley.com/doi/pdf/10.](https://zslpublications.onlinelibrary.wiley.com/doi/pdf/10.1002/rse2.367)  
401 [1002/rse2.367](https://zslpublications.onlinelibrary.wiley.com/doi/pdf/10.1002/rse2.367).
- 402 Nair, Tanya, Doina Precup, Douglas L. Arnold, and Tal Arbel (Oct. 2018). *Exploring*  
403 *Uncertainty Measures in Deep Networks for Multiple Sclerosis Lesion Detection and*  
404 *Segmentation*. arXiv:1808.01200 [cs]. DOI: 10.48550/arXiv.1808.01200.
- 405 Norman, Danielle L., Philipp H. Bischoff, Oliver R. Wearn, Robert M. Ewers, J. Marcus  
406 Rowcliffe, Benjamin Evans, Sarab Sethi, Philip M. Chapman, and Robin Freeman  
407 (2023). “Can CNN-based species classification generalise across variation in habi-  
408 tat within a camera trap survey?” en. In: *Methods in Ecology and Evolution* 14.1.  
409 eprint: <https://onlinelibrary.wiley.com/doi/pdf/10.1111/2041-210X.14031>, pp. 242–  
410 251. ISSN: 2041-210X. DOI: 10.1111/2041-210X.14031.
- 411 Norouzzadeh, Mohammad Sadegh, Anh Nguyen, Margaret Kosmala, Alexandra Swan-  
412 son, Meredith S. Palmer, Craig Packer, and Jeff Clune (June 2018). “Automatically  
413 identifying, counting, and describing wild animals in camera-trap images with deep

- 414 learning”. en. In: *Proceedings of the National Academy of Sciences* 115.25. ISSN:  
415 0027-8424, 1091-6490. DOI: 10.1073/pnas.1719367115.
- 416 Parsons, Arielle W., Kenneth F. Kellner, Christopher T. Rota, Stephanie G. Schuttler,  
417 Joshua J. Millspaugh, and Roland W. Kays (2022). “The effect of urbanization on  
418 spatiotemporal interactions between gray foxes and coyotes”. en. In: *Ecosphere* 13.3.  
419 eprint: <https://onlinelibrary.wiley.com/doi/pdf/10.1002/ecs2.3993>, e3993. ISSN: 2150-  
420 8925. DOI: 10.1002/ecs2.3993.
- 421 Platt, John (June 2000). “Probabilistic Outputs for Support Vector Machines and Com-  
422 parisons to Regularized Likelihood Methods”. In: *Adv. Large Margin Classif.* 10.
- 423 Rahaman, Rahul and Alexandre H. Thiery (Nov. 2021). *Uncertainty Quantification and*  
424 *Deep Ensembles*. arXiv:2007.08792 [cs, stat].
- 425 Ridnik, Tal, Emanuel Ben-Baruch, Asaf Noy, and Lihi Zelnik-Manor (Aug. 2021). *ImageNet-*  
426 *21K Pretraining for the Masses*. arXiv:2104.10972 [cs]. DOI: 10.48550/arXiv.2104.  
427 10972.
- 428 Rigoudy, Noa, Gaspard Dussert, Abdelbaki Benyoub, Aurélien Besnard, Carole Birck,  
429 Jérôme Boyer, Yoann Bollet, Yoann Bunz, Gérard Caussimont, Elias Chetouane,  
430 Jules Chiffard Carriburu, Pierre Cornette, Anne Delestrade, Nina De Backer, Lucie  
431 Dispan, Maden Le Barh, Jeanne Duhayer, Jean-François Elder, Jean-Baptiste Fan-  
432 jul, Jocelyn Fonderflick, Nicolas Froustey, Mathieu Garel, William Gaudry, Agathe  
433 Gérard, Olivier Gimenez, Arzhela Hemery, Audrey Hemon, Jean-Michel Jullien,  
434 Daniel Knitter, Isabelle Malafosse, Mircea Marginean, Louise Ménard, Alice Ou-  
435 vrier, Gwennaelle Pariset, Vincent Prunet, Julien Rabault, Malory Randon, Yann  
436 Raulet, Antoine Régnier, Romain Ribière, Jean-Claude Ricci, Sandrine Ruetter, Yann  
437 Schneylin, Jérôme Sentilles, Nathalie Siefert, Bethany Smith, Guillaume Terpereau,  
438 Pierrick Touchet, Wilfried Thuiller, Antonio Uzal, Valentin Vautrain, Ruppert Vi-  
439 mal, Julian Weber, Bruno Spataro, Vincent Miele, and Simon Chamaillé-Jammes  
440 (Oct. 2023). “The DeepFaune initiative: a collaborative effort towards the automatic

- 441 identification of European fauna in camera trap images”. In: *European Journal of*  
442 *Wildlife Research* 69.6, p. 113. DOI: 10.1007/s10344-023-01742-7.
- 443 Simpson, Robert, Kevin R. Page, and David De Roure (Apr. 2014). “Zooniverse: ob-  
444 serving the world’s largest citizen science platform”. en. In: *Proceedings of the 23rd*  
445 *International Conference on World Wide Web*. Seoul Korea: ACM, pp. 1049–1054.  
446 ISBN: 978-1-4503-2745-9. DOI: 10.1145/2567948.2579215.
- 447 Sollmann, Rahel (2018). “A gentle introduction to camera-trap data analysis”. en. In:  
448 *African Journal of Ecology* 56.4. eprint: <https://onlinelibrary.wiley.com/doi/pdf/10.1111/aje.12557>,  
449 pp. 740–749. ISSN: 1365-2028. DOI: 10.1111/aje.12557.
- 450 Szegedy, Christian, Vincent Vanhoucke, Sergey Ioffe, Jonathon Shlens, and Zbigniew  
451 Wojna (Dec. 2015). *Rethinking the Inception Architecture for Computer Vision*.  
452 arXiv:1512.00567 [cs].
- 453 Tan, Mingxing and Quoc V. Le (June 2021). *EfficientNetV2: Smaller Models and Faster*  
454 *Training*. arXiv:2104.00298 [cs].
- 455 Wang, Deng-Bao, Lanqing Li, Peilin Zhao, Pheng-Ann Heng, and Min-Ling Zhang  
456 (2023). “On the Pitfall of Mixup for Uncertainty Calibration”. en. In: pp. 7609–  
457 7618.
- 458 Whytock, Robin C., Thijs Suijten, Tim van Deursen, Jędrzej Świeżewski, Hervé Mer-  
459 miaghe, Nazaire Madamba, Narcisse Mouckoumou, Joeri A. Zwerts, Aurélie Flore  
460 Koumba Pambo, Laila Bahaa-el-din, Stephanie Brittain, Anabelle W. Cardoso, Philipp  
461 Henschel, David Lehmann, Brice Roxan Momboua, Loïc Makaga, Christopher Or-  
462 bell, Lee J. T. White, Donald Midoko Iponga, and Katharine A. Abernethy (2023).  
463 “Real-time alerts from AI-enabled camera traps using the Iridium satellite network: A  
464 case-study in Gabon, Central Africa”. en. In: *Methods in Ecology and Evolution* 14.3.  
465 eprint: <https://onlinelibrary.wiley.com/doi/pdf/10.1111/2041-210X.14036>, pp. 867–  
466 874. ISSN: 2041-210X. DOI: 10.1111/2041-210X.14036.

- 467 Whytock, Robin C., Jędrzej Świeżewski, Joeri A. Zwerts, Tadeusz Bara-Ślupski, Aurélie  
468 Flore Koumba Pambo, Marek Rogala, Laila Bahaa-el-din, Kelly Boekee, Stephanie  
469 Brittain, Anabelle W. Cardoso, Philipp Henschel, David Lehmann, Brice Momboua,  
470 Cisquet Kiebou Opepa, Christopher Orbell, Ross T. Pitman, Hugh S. Robinson, and  
471 Katharine A. Abernethy (2021). “Robust ecological analysis of camera trap data la-  
472 belled by a machine learning model”. en. In: *Methods in Ecology and Evolution* 12.6.  
473 \_eprint: <https://onlinelibrary.wiley.com/doi/pdf/10.1111/2041-210X.13576>, pp. 1080–  
474 1092. ISSN: 2041-210X. DOI: 10.1111/2041-210X.13576.
- 475 Wightman, Ross (2019). *PyTorch Image Models*. [https://github.com/rwightman/  
476 pytorch-image-models](https://github.com/rwightman/pytorch-image-models). DOI: 10.5281/zenodo.4414861.
- 477 Willi, Marco, Ross T. Pitman, Anabelle W. Cardoso, Christina Locke, Alexandra Swan-  
478 son, Amy Boyer, Marten Veldthuis, and Lucy Fortson (2019). “Identifying animal  
479 species in camera trap images using deep learning and citizen science”. en. In: *Meth-  
480 ods in Ecology and Evolution* 10.1. \_eprint: [https://onlinelibrary.wiley.com/doi/pdf/10.1111/2041-  
210X.13099](https://onlinelibrary.wiley.com/doi/pdf/10.1111/2041-<br/>481 210X.13099), pp. 80–91. ISSN: 2041-210X. DOI: 10.1111/2041-210X.13099.
- 482 Wu, Xixin and Mark Gales (Jan. 2021). *Should Ensemble Members Be Calibrated?*  
483 arXiv:2101.05397 [cs, stat].
- 484 Zhang, Hongyi, Moustapha Cisse, Yann N. Dauphin, and David Lopez-Paz (Apr. 2018).  
485 *mixup: Beyond Empirical Risk Minimization*. arXiv:1710.09412 [cs, stat]. DOI: 10.  
486 48550/arXiv.1710.09412.
- 487 Zuleger, Annika, Andrea Perino, Florian Wolf, Helen C. Wheeler, and Henrique M.  
488 Pereira (2023). “Long-term monitoring of mammal communities in the Peneda-Gerês  
489 National Park using camera trap data”. In: *ARPHA Preprints* 4, ARPHA Preprints.  
490 DOI: 10.3897/arphapreprints.e99983. eprint: [https://doi.org/10.3897/  
arphapreprints.e99983](https://doi.org/10.3897/<br/>491 arphapreprints.e99983).

## 492 Supplementary materials

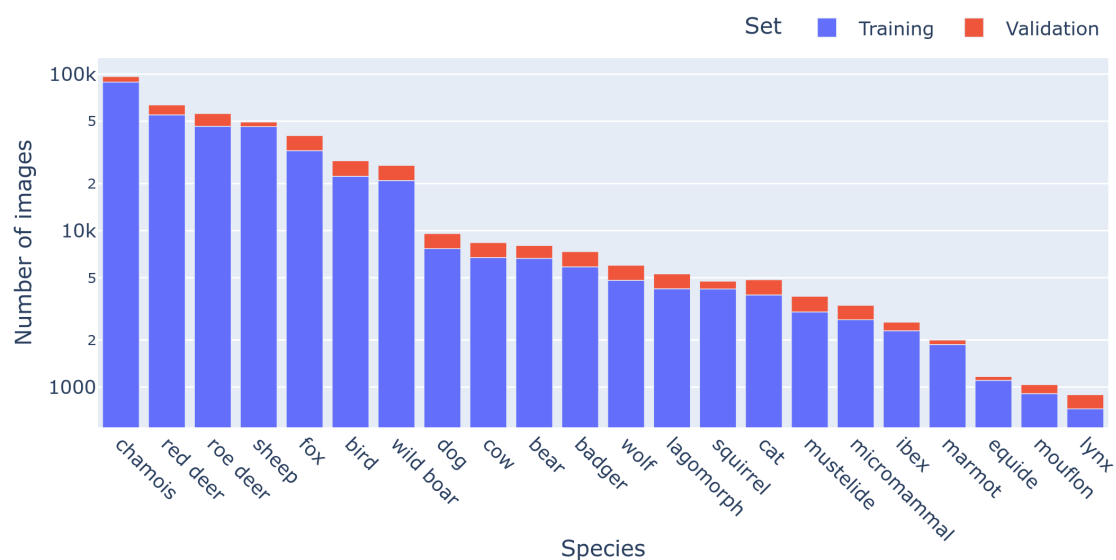

Figure 6: Number of images in the training and validation sets, for each species. Log scale is used to improve the readability of the rarer classes.

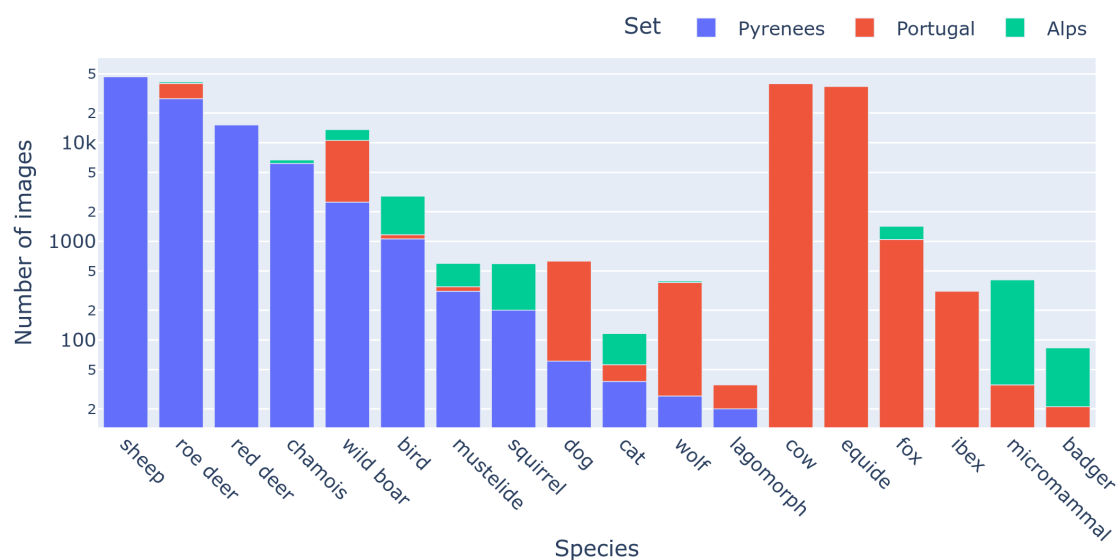

Figure 7: Number of images in the three out-of-sample datasets, for each species. Log scale is used to improve the readability of the rarer classes.



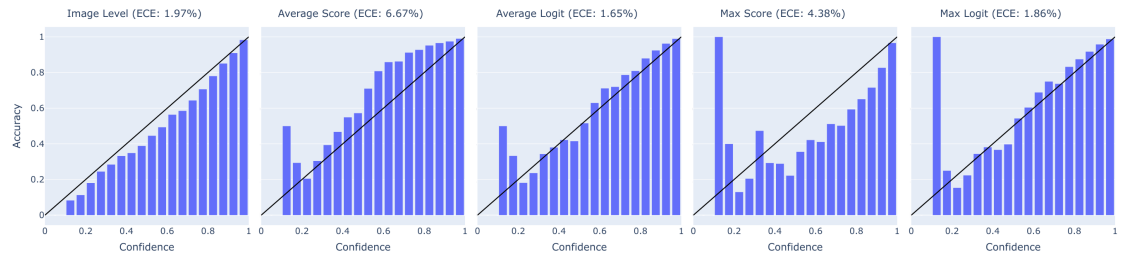

Figure 8: Reliability histogram of the ConvNext model, using the 3 test sets pooled together, and without temperature scaling.
